# Supplementary material for: Alkyladenine DNA glycosylase associates with transcription elongation to coordinate DNA repair with gene expression
Source: PubMed Central journal article supplement (PMC6884549; doi:10.1038/s41467-019-13394-w), 2019-11-29
Supplement: 41467_2019_13394_MOESM1_ESM.pdf [file 41467_2019_13394_MOESM1_ESM.pdf]

**Title: “Alkyladenine DNA glycosylase associates with transcription elongation to coordinate DNA repair with gene expression”**

**Montaldo et al.**

## SUPPLEMENTARY TABLES AND FIGURES

**Supplementary Table 1.** List of DNA oligonucleotides used for CRISPR-Cas9 editing.

| DNA oligonucleotides             | Sequence 5' to 3'                                                                                                                                                                                          |
|----------------------------------|------------------------------------------------------------------------------------------------------------------------------------------------------------------------------------------------------------|
| AAG <sup>-/-</sup> sgRNA         | GCTGGCGGTGCCTTTCCGGA                                                                                                                                                                                       |
| AAG <sup>-/-</sup> sgRNA top     | CACCGGCTGGCGGTGCCTTTCCGGA                                                                                                                                                                                  |
| AAG <sup>-/-</sup> sgRNA bottom  | AAACTCCGGAAAGGCACCGCCAGCC                                                                                                                                                                                  |
| ELP1 <sup>-/-</sup> sgRNA        | AGCTCAGATTCGGAAGTGGT                                                                                                                                                                                       |
| ELP1 <sup>-/-</sup> sgRNA top    | CACCGAGCTCAGATTCGGAAGTGGT                                                                                                                                                                                  |
| ELP1 <sup>-/-</sup> sgRNA bottom | AAACACCACTTCCGAATCTGAGCAC                                                                                                                                                                                  |
| HA-ELP1 sgRNA                    | GACTGAGTGACTGCAGTTAGG                                                                                                                                                                                      |
| HA-ELP1 sgRNA top                | CACCGACTGAGTGACTGCAGTTAGG                                                                                                                                                                                  |
| HA-ELP1 sgRNA bottom             | AAACCCTAACTGCAGTCACTCAGT                                                                                                                                                                                   |
| PCR #1 HA insertion Fw:          | TTGCTCTGACCTGGAGGTTG                                                                                                                                                                                       |
| PCR #1 HA insertion Rv:          | GTAGTCCGGAACGTCGTAG                                                                                                                                                                                        |
| PCR #2 BspEI digestion Fw:       | TTGCTCTGACCTGGAGGTTG                                                                                                                                                                                       |
| PCR #2 BspEI digestion Rv:       | GCTCTCAAACAGCCCAAGTG                                                                                                                                                                                       |
| HA-ELP1 repair oligo:            | TTGCTTTTATAGATGCTGAGCTTTTTATACCACCAAAGATCAA<br>CAGAAGAACCCAG<br>TGGAAGCTGAGCCTGCTAGACTACCCCTACGACGTTCCG<br>GACTACGCCTGAGAGAAGACCATTTCCACTCATTCCTGTT<br>GTCCTACCACCCCTTGCTCTTTGAGGGCTGGCTATTGAGA<br>ACTGGAA |

**Supplementary Table 2.** List of DNA primers used to generate mammalian expression constructs containing 1-80aa AAG and  $\Delta$ 80 AAG.

| <b>DNA primers</b>  |                          |                          |
|---------------------|--------------------------|--------------------------|
| <b>Name</b>         | <b>Forward / Reverse</b> | <b>Sequence 5' to 3'</b> |
| GFP-1-80aa AAG      | Fw                       | TGAGGATCCACCGGATCTAG     |
|                     | Rv                       | CTTTGGGCTTGAGAAATAGATGC  |
| 1-80aa AAG-GFP      | Fw                       | GATCCACCGGTGCGCA         |
|                     | Rv                       | CTTTGGGCTTGAGAAATAGATGC  |
| GFP- $\Delta$ 80AAG | Fw                       | GGCCACCTTACCCGACTGG      |
|                     | Rv                       | CATAAGCTTGAGCGATCTGAGTCC |

**Supplementary Table 3.** List of DNA primers used for RT-qPCR analysis of mRNA level.

| <b>cDNA primers</b> |                          |                          |
|---------------------|--------------------------|--------------------------|
| <b>Name</b>         | <b>Forward / Reverse</b> | <b>Sequence 5' to 3'</b> |
| GAPDH               | Fw                       | GAGTCAACGGATTTGGTCGT     |
|                     | Rv                       | TTGATTTTGGAGGGATCTCG     |
| ALDH1A2             | Fw                       | GCTCTCATGGTATCCTCCGC     |
|                     | Rv                       | TCCCGTAAGCCAAACTCACC     |
| CRMP1               | Fw                       | CTCTGCTGTCAGTTCGCCAG     |
|                     | Rv                       | GATGCGTCCACCTCTGATGA     |
| CDH23               | Fw                       | CGGAGTGGATCCCAGAGAGA     |
|                     | Rv                       | GCAAGTGACCAGGGAGTACC     |
| YTHDC1              | Fw                       | GAGGGCCAAATCTCCTACGC     |
|                     | Rv                       | GTCTCATGGTCAGAGCCATATTC  |
| SYT9                | Fw                       | GGGATCCAGGAGAACTGTGC     |
|                     | Rv                       | TCCGGGTTTGACAAGTTGAGT    |
| CDH4                | Fw                       | GATGTACGTCACAAGGCCCA     |
|                     | Rv                       | AGGGCGGTTGTCATTCATGT     |
| NPTX2               | Fw                       | TCTGGTGACTTAAAGGCGCT     |
|                     | Rv                       | CTGCACAATGAGACCTCGG      |
| NOVA2               | Fw                       | ACTGTTCCATCACGGCTTTC     |
|                     | Rv                       | ACGATGAACCCCGACAGA       |
| CDH22               | Fw                       | CACAACATCACAGTGCTGGC     |
|                     | Rv                       | CATACAGCTGCCTCGTAGGG     |

**Supplementary Table 4.** List of DNA primers used for ChIP analysis.

| <b>ChIP primers</b> |                          |                            |
|---------------------|--------------------------|----------------------------|
| <b>Name</b>         | <b>Forward / Reverse</b> | <b>Sequence 5' to 3'</b>   |
| ALDH1A2 -0.5 kb     | Fw                       | GAAGTCGAGCGAGGGTTCG        |
|                     | Rv                       | CTCTACTCCGAAGCAGCACC       |
| ALDH1A2 +45 kb      | Fw                       | CTGACAGAATTTATCTGAAGGACTC  |
|                     | Rv                       | ATGAGGTAAAACCTGACCATAGAAGC |
| ALDH1A2 +111 kb     | Fw                       | GGATGGGAAGAAAGGGAGGC       |
|                     | Rv                       | GCCAAGTTCCATTGTGCCAG       |
| CRMP1 -0.5 kb       | Fw                       | GTGGTAAGGGCCAGGAAAGG       |
|                     | Rv                       | TGTGTCTGTCGGAGTGTGC        |
| CRMP1 +1 kb         | Fw                       | AATTCGAAAGCTCCCCAGCC       |
|                     | Rv                       | GTAGCCTTTGGATGGACCGA       |
| CRMP1 +32 kb        | Fw                       | AGAAGTCATCAGCCGCAGTC       |
|                     | Rv                       | CGGATGGTTATTCCCGGAGG       |
| CRMP1 +72 kb        | Fw                       | CAGGTCAGTGGGCAGTTCAT       |
|                     | Rv                       | GTTGACGGGGCAGTCAGATT       |
| CDH23 -0.5 kb       | Fw                       | GTTGAGGCCCCAGAAAGTCTCA     |
|                     | Rv                       | TTCCGAGCTGTCACTGTTCC       |
| CDH23 +1 kb         | Fw                       | CTTTTGCGGCTCTCGCTTC        |
|                     | Rv                       | GCTGACCTACGGTGGAGATG       |
| CDH23 +167 kb       | Fw                       | CTCCTTGCCAGGCCCATTTA       |
|                     | Rv                       | TATGTTTCATGCCCTGCGGT       |
| CDH23 +420 kb       | Fw                       | CCCCACGTGGACAAGAAAGT       |
|                     | Rv                       | AACCGGAGGGAACATCAGTC       |
| YTHDC1 -1 kb        | Fw                       | AGCAGACCATCGAGGAATCG       |
|                     | Rv                       | TGTTTCCGTTGGACAATGAATCT    |
| YTHDC1 +1 kb        | Fw                       | AGAGCCCACTTAACAACCCC       |
|                     | Rv                       | AATATGACACGGTCGCTGCT       |
| YTHDC1 +17 kb       | Fw                       | AGCCATTATCACACAAAGGGGT     |
|                     | Rv                       | AGCCTTCCAGGTTGAATGGG       |
| YTHDC1 +35 kb       | Fw                       | ATCGGCGGAGAGAACAATCC       |
|                     | Rv                       | ACCATGTCAGCATATTACCTTCTGT  |



**a**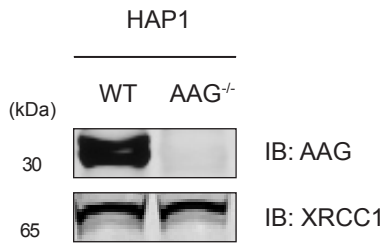**b**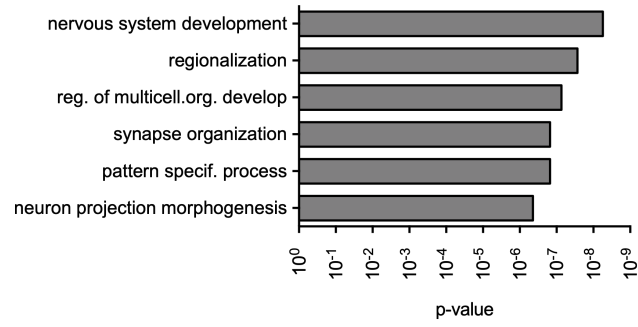

**Supplementary Figure 1.** Loss of AAG alters expression of neurodevelopmental genes in HAP1 cells. (a) Immunoblot of whole cell extracts from HAP1 WT and AAG<sup>-/-</sup> cell lines generated via CRISPR-Cas9 technology. (b) Top six biological processes (BP) gene ontology (GO) terms as determined by the Database for Annotation, Visualization and Integrated Discovery (DAVID) for genes dysregulated in AAG<sup>-/-</sup> in HAP1 cells.

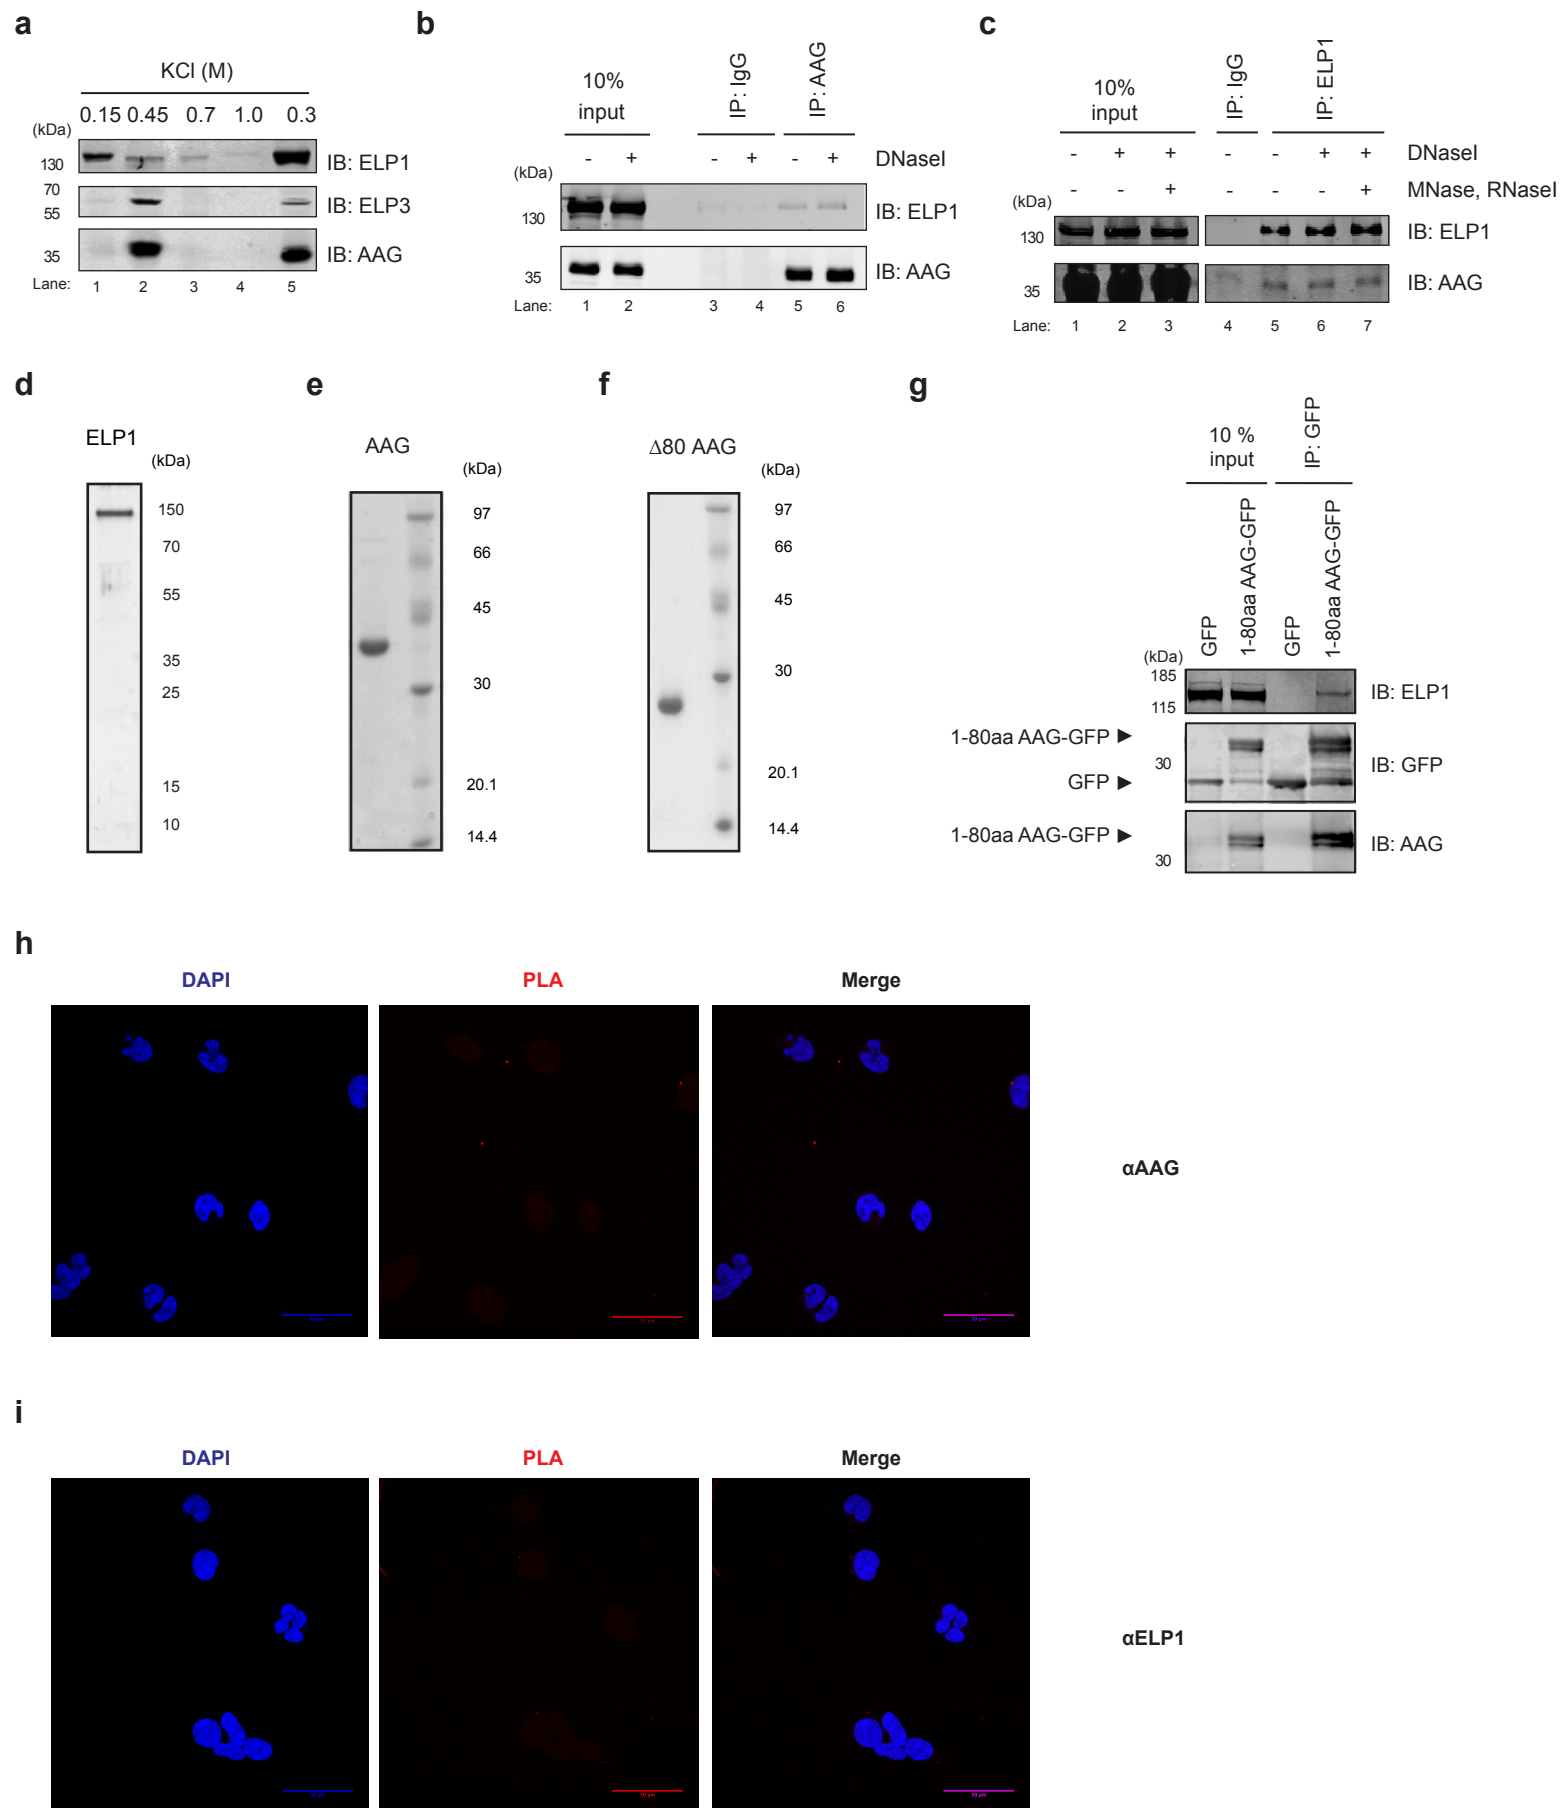

**Supplementary Figure 2. AAG and ELP1 subunit of transcriptional Elongator complex directly interact.** (a) Separation of cellular complexes from HeLa cells by heparin-sepharose affinity chromatography. The elutions at the indicated potassium chloride (KCl) concentrations were immunoblotted and probed for AAG and ELP1 and ELP3. (b) AAG-mediated immuno-precipitation of whole cell extracts from HEK293T treated and untreated DNaseI. (c) IP of AAG from HEK293T WCEs untreated or treated with DNaseI, Mnase and RNaseI. (d-f) SDS-PAGE analysis of purified recombinant FLAG-tagged ELP1 (d); AAG (f); and  $\Delta 80$  AAG (e). (g) IP of GFP-tagged first 80 N-terminal amino acids of AAG (1-80aa AAG) (GFP-1-80aa AAG) expressed in HEK293T AAG<sup>-/-</sup> cells. GFP-tag positioned C-terminally. (h,i) Negative controls of proximity ligation assay (PLA) in the presence of single antibodies targeting AAG (h) and ELP1 (i). Scale bar: 50  $\mu$ m. Source data are provided as a Source Data file.

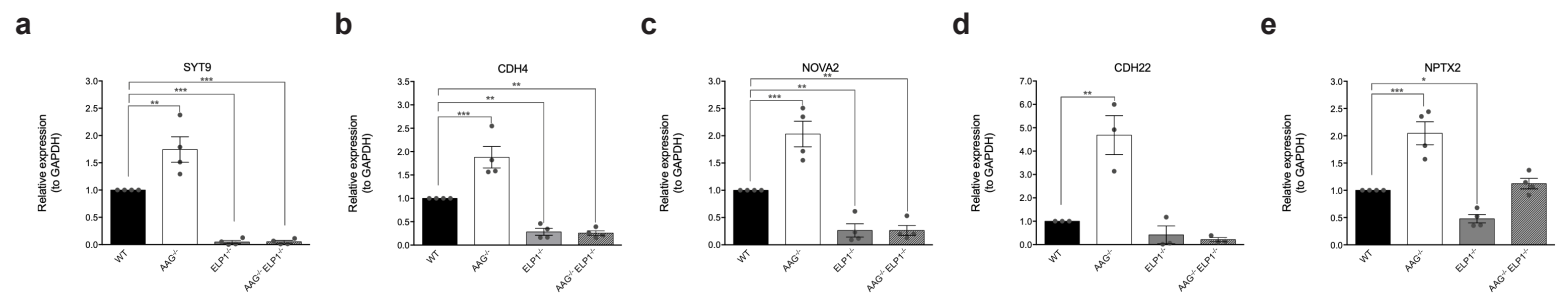

**Supplementary Figure 3. AAG and ELP1 regulate expression of neurodevelopmental genes.** (a-e) Expression of additional neurodevelopmental genes *SYT9* (a), *CDH4* (b), *NOVA2* (c), *CDH22* (d), *NPTX2* (e) in WT, AAG<sup>-/-</sup>, ELP1<sup>-/-</sup> and AAG<sup>-/-</sup> ELP1<sup>-/-</sup>. Error bars indicate mean ± SEM (n ≥ 3). \*p ≤ 0.05, \*\*p ≤ 0.01, \*\*\*p ≤ 0.001, one-way ANOVA. Source data are provided as a Source Data file.

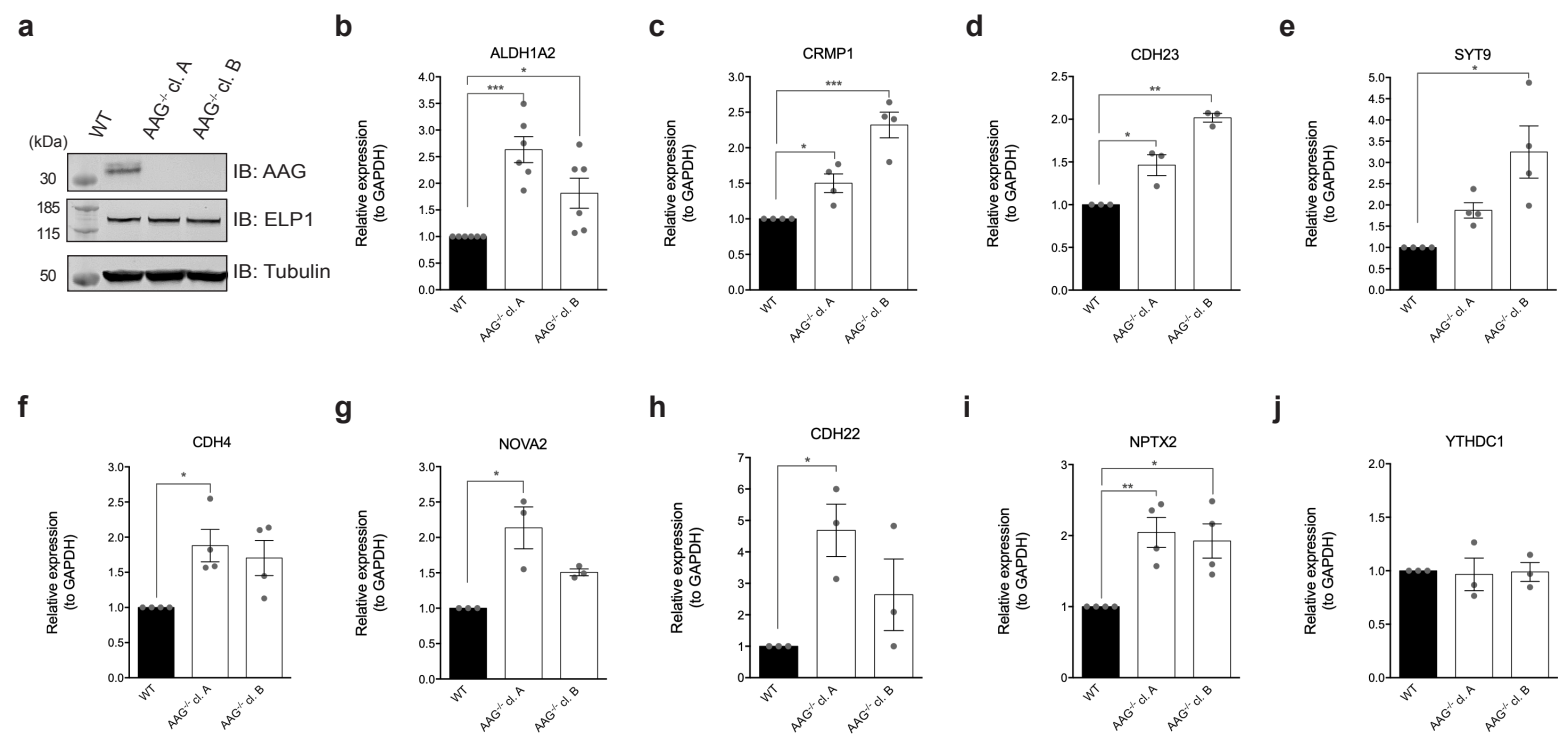

**Supplementary Figure 4. AAG regulatory effect on expression of neurodevelopmental genes is specific and reproducible in different knockout clones.** (a) Immunoblot of whole cell extracts of HEK293T WT, AAG<sup>-/-</sup> clone A and AAG<sup>-/-</sup> clone B generated via CRISPR-Cas9 technology. (b-j) mRNA expression levels of *ALDH1A2* (b), *CRMP1* (c), *CDH23* (d), *SYT9* (e), *CDH4* (f), *NOVA2* (g), *CDH22* (h), *NPTX2* (i) and *YTHDC1* (j) genes in WT, AAG<sup>-/-</sup> clone A and AAG<sup>-/-</sup> clone B. Error bars indicate mean  $\pm$  SEM ( $n \geq 3$ ). \* $p \leq 0.05$ , \*\* $p \leq 0.01$ , \*\*\* $p \leq 0.001$ , one-way ANOVA. Source data are provided as a Source Data file.

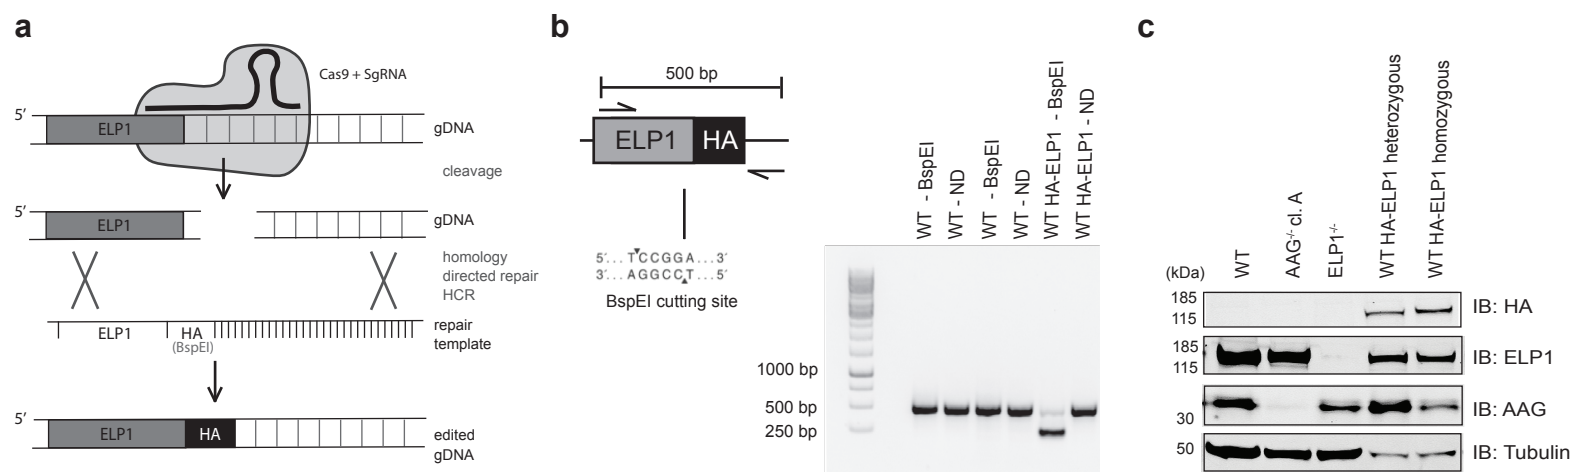

**Supplementary Figure 5. Generation of HA-ELP1 HEK293T cell lines.** (a) Schematic representation of the used approach. (b) Identification of the clone homozygous for the HA insertion, by PCR and subsequent enzymatic digestion with BspEI. (c) Immunoblot of whole cell extracts of HEK293T WT, AAG<sup>-/-</sup>, ELP1<sup>-/-</sup> and WT HA-ELP1 (heterozygous and homozygous) cell lines generated via CRISPR-Cas9 technology. The HA-ELP1 cell lines tested by immunoblotting were additionally sequenced confirming the HA insertion in frame with ELP1. Source data are provided as a Source Data file.

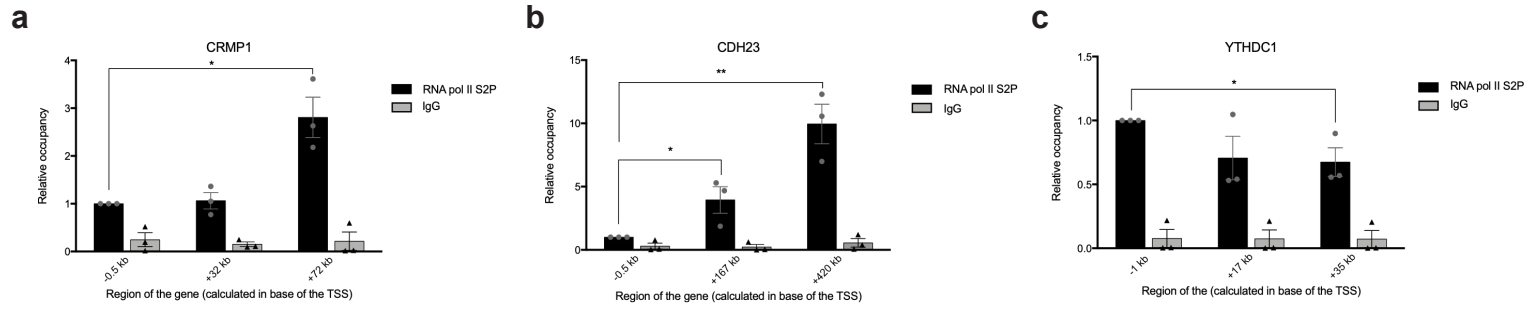

**Supplementary Figure 6. RNA polymerase II distribution along co-regulated genes. (a-c)** ChIP assays showing relative RNA pol II S2P (RNA pol II phosphorylated at Serine 2 of the C-terminal domain) occupancy in genes co-regulated by AAG and ELP1: *CRMP1* (a), *CDH23* (b) and unaffected gene *YTHDC1* (c) in WT HEK293T cells. Values are shown as relative occupancy: % input of specific gene region relative to % input of promoter region. Error bars indicate mean  $\pm$  SEM (n=3). \* $p \leq 0.05$ , \*\* $p \leq 0.01$ , two-tailed Student's t test. Source data are provided as a Source Data file.

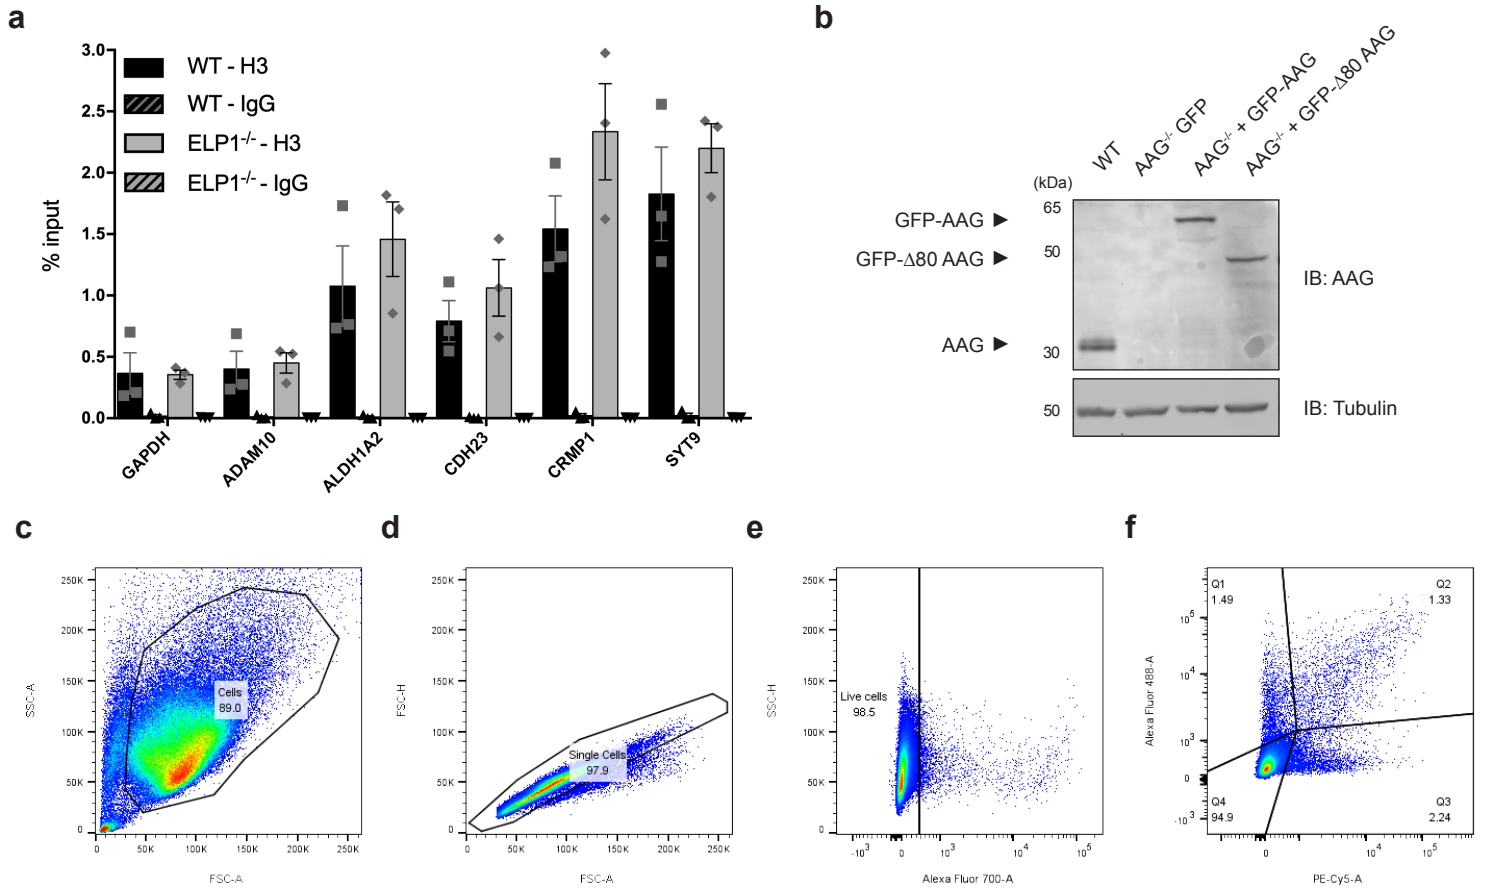

**Supplementary Figure 7. *ELP1* status does not affect H3 occupancy, but does influence AAG-initiated BER.** (a) ChIP-qPCR experiments targeting histone 3 (H3) in promoters of co-regulated genes in WT and *ELP1*<sup>-/-</sup> HEK293T cells. Error bars indicate mean ± SEM (n=3). (b) Immunoblot analysis of AAG levels in WT and *AAG*<sup>-/-</sup> cells complemented with GFP, GFP-AAG, or GFP-Δ80 AAG. (c-f) Representative flow cytometry plots of gating strategies used for FM-HCR presented in Fig.5 i and j to select: cell population (c), single cells (d), and live cells negative for Zombie NIR (Alexa Fluor 700) (e). (f) Visualisation of cells positive for GFP (Alexa Fluor 488) and mPlum (PE-Cy5). For the quantification of GFP positive cells Q1 and Q2 were analysed. For the quantification of mPlum positive cells Q2 and Q3 were analysed. Source data are provided as a Source Data file.

**a**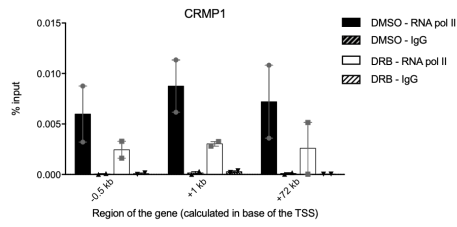**b**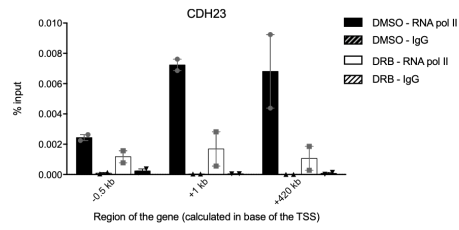**c**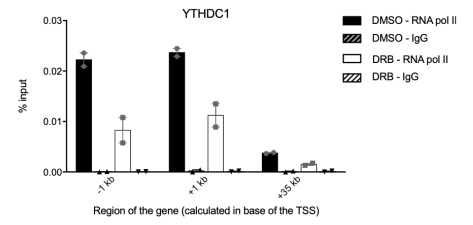

**Supplementary Figure 8. DRB treatment reduces RNA polymerase II occupancy.** (a-c) ChIP-qPCR experiments comparing RNA polymerase (pol) II occupancy in DMSO and DRB treated WTCas9 HEK293T cells at *CRMP1* (a), *CDH23* (b) and *YTHDC1* (c) genes. Error bars indicate mean  $\pm$  SEM (n=2). Source data are provided as a Source Data file.
