# Supplementary material for: Alkyladenine DNA glycosylase associates with transcription elongation to coordinate DNA repair with gene expression
Source: PubMed Central journal article supplement (PMC6884549; doi:10.1038/s41467-019-13394-w), 2019-11-29
Supplement: 41467_2019_13394_MOESM3_ESM.pdf [file 41467_2019_13394_MOESM3_ESM.pdf]

## **Description of Additional Supplementary Files**

File Name: Supplementary Data 1

Description: Gene ontology (GO) analysis of differentially expressed genes (DEGs) in HEK293T AAG<sup>-/-</sup>, HEK293T ELP1<sup>-/-</sup> and HAP1 AAG<sup>-/-</sup> cells. Depicted are: Count – number of DEGs in each GO category; % – of genes within DEG that segregates to specific biological process; Gene list length for each GO term; and respective p- and Benjamini correction-values.

File Name: Supplementary Data 2

Description: Proteomics Data for FLAG and FLAG-AAG co-immunoprecipitation.
